# Supplementary material for: Halogen Bonding in (Z)-2-Iodocinnamaldehyde
Source: Molecules. 2013 Jul 24;18(8):8712–24. doi: 10.3390/molecules18088712 (PMC6269847; doi:10.3390/molecules18088712)
Supplement: Supplementary file 1 [file molecules-18-08712-s001.cif]

 
data_(Z)-2-iodocinnamaldehyde 
 
_audit_creation_method            SHELXL-97 
_publ_contact_author_name           "F. Caruso"
_publ_contact_author_address
;Istituto Chimica Biomolecolare ICB-CNR Ple Aldo 
Moro 5 00185 Rome Italy
;
_publ_contact_letter
;F. Caruso
;
_publ_contact_author_phone          ?
_publ_contact_author_fax            ?
_publ_contact_author_email          caruso@vassar.edu
_publ_requested_journal             "Molecules"
_publ_requested_category            "full article"
_publ_requested_coeditor_name       ?

_publ_section_title  
;Halogen bond interaction in (Z)-2-iodocinnamaldehyde
;
loop_
_publ_author_name

"P. Bovonsombat"
"F.Caruso"
"M. Rossi"

_chemical_name_systematic 
; 
(Z)-2-iodocinnamaldehyde 
; 
_chemical_name_common             (Z)-2-iodocinnamaldehyde  
_chemical_melting_point           ? 
_chemical_formula_moiety          'C9 H7 I O' 
_chemical_formula_sum             'C9 H7 I O' 
_chemical_formula_weight          258.05 
 
loop_ 
 _atom_type_symbol 
 _atom_type_description 
 _atom_type_scat_dispersion_real 
 _atom_type_scat_dispersion_imag 
 _atom_type_scat_source 
 'C'  'C'   0.0033   0.0016 
 'International Tables Vol C Tables 4.2.6.8 and 6.1.1.4' 
 'H'  'H'   0.0000   0.0000 
 'International Tables Vol C Tables 4.2.6.8 and 6.1.1.4' 
 'O'  'O'   0.0106   0.0060 
 'International Tables Vol C Tables 4.2.6.8 and 6.1.1.4' 
 'I'  'I'  -0.4742   1.8119 
 'International Tables Vol C Tables 4.2.6.8 and 6.1.1.4' 
 
_symmetry_cell_setting            orthorhombic 
_symmetry_space_group_name_H-M    Pbca 
 
loop_ 
 _symmetry_equiv_pos_as_xyz 
 'x, y, z' 
 'x+1/2, -y+1/2, -z' 
 '-x, y+1/2, -z+1/2' 
 '-x+1/2, -y, z+1/2' 
 '-x, -y, -z' 
 '-x-1/2, y-1/2, z' 
 'x, -y-1/2, z-1/2' 
 'x-1/2, y, -z-1/2' 
 
_cell_length_a                    11.4372(6) 
_cell_length_b                    8.6736(5) 
_cell_length_c                    16.8274(9) 
_cell_angle_alpha                 90.00 
_cell_angle_beta                  90.00 
_cell_angle_gamma                 90.00 
_cell_volume                      1669.31(16) 
_cell_formula_units_Z             8 
_cell_measurement_temperature     125(2) 
_cell_measurement_reflns_used     ? 
_cell_measurement_theta_min       ? 
_cell_measurement_theta_max       ? 
 
_exptl_crystal_description        'plate' 
_exptl_crystal_colour             'colourless' 
_exptl_crystal_size_max           0.25 
_exptl_crystal_size_mid           0.17 
_exptl_crystal_size_min           0.10 
_exptl_crystal_density_meas       ? 
_exptl_crystal_density_diffrn     2.053  
_exptl_crystal_density_method     'not measured' 
_exptl_crystal_F_000              976 
_exptl_absorpt_coefficient_mu     3.772 
_exptl_absorpt_correction_type    empirical 
_exptl_absorpt_correction_T_min   0.4504 
_exptl_absorpt_correction_T_max   0.7027 
_exptl_absorpt_process_details    SADABS 
 
_exptl_special_details 
; 
 ? 
; 
 
_diffrn_ambient_temperature       125(2) 
_diffrn_radiation_wavelength      0.71073 
_diffrn_radiation_type            MoK\a 
_diffrn_radiation_source          'fine-focus sealed tube' 
_diffrn_radiation_monochromator   graphite 
_diffrn_measurement_device_type   'CCD area detector' 
_diffrn_measurement_method        'phi and omega scans' 
_diffrn_detector_area_resol_mean  ? 
_diffrn_reflns_number             24123 
_diffrn_reflns_av_R_equivalents   0.0355 
_diffrn_reflns_av_sigmaI/netI     0.0181 
_diffrn_reflns_limit_h_min        -16 
_diffrn_reflns_limit_h_max        16 
_diffrn_reflns_limit_k_min        -12 
_diffrn_reflns_limit_k_max        12 
_diffrn_reflns_limit_l_min        -23 
_diffrn_reflns_limit_l_max        23 
_diffrn_reflns_theta_min          2.42 
_diffrn_reflns_theta_max          30.03 
_reflns_number_total              2436 
_reflns_number_gt                 2057 
_reflns_threshold_expression      >2sigma(I) 
 
_computing_data_collection        'Bruker SMART' 
_computing_cell_refinement        'Bruker SMART' 
_computing_data_reduction         'Bruker SAINT' 
_computing_structure_solution     'SHELXS-97 (Sheldrick, 2008)' 
_computing_structure_refinement   'SHELXL-97 (Sheldrick, 2008)' 
_computing_molecular_graphics     'Mercury' 
_computing_publication_material   'Bruker SHELXTL' 
 
_refine_special_details 
; 
 Refinement of F^2^ against ALL reflections.  The weighted R-factor wR and 
 goodness of fit S are based on F^2^, conventional R-factors R are based 
 on F, with F set to zero for negative F^2^. The threshold expression of 
 F^2^ > 2sigma(F^2^) is used only for calculating R-factors(gt) etc. and is 
 not relevant to the choice of reflections for refinement.  R-factors based 
 on F^2^ are statistically about twice as large as those based on F, and R- 
 factors based on ALL data will be even larger. 
; 
 
_refine_ls_structure_factor_coef  Fsqd  
_refine_ls_matrix_type            full 
_refine_ls_weighting_scheme       calc  
_refine_ls_weighting_details 
 'calc w=1/[\s^2^(Fo^2^)+(0.0141P)^2^+1.8924P] where P=(Fo^2^+2Fc^2^)/3' 
_atom_sites_solution_primary      direct 
_atom_sites_solution_secondary    difmap 
_atom_sites_solution_hydrogens    geom 
_refine_ls_hydrogen_treatment     mixed 
_refine_ls_extinction_method      none 
_refine_ls_extinction_coef        ? 
_refine_ls_number_reflns          2436 
_refine_ls_number_parameters      128 
_refine_ls_number_restraints      0 
_refine_ls_R_factor_all           0.0248 
_refine_ls_R_factor_gt            0.0181 
_refine_ls_wR_factor_ref          0.0441 
_refine_ls_wR_factor_gt           0.0408 
_refine_ls_goodness_of_fit_ref    1.026 
_refine_ls_restrained_S_all       1.026 
_refine_ls_shift/su_max           0.003 
_refine_ls_shift/su_mean          0.000 
 
loop_ 
 _atom_site_label 
 _atom_site_type_symbol 
 _atom_site_fract_x 
 _atom_site_fract_y 
 _atom_site_fract_z 
 _atom_site_U_iso_or_equiv 
 _atom_site_adp_type 
 _atom_site_occupancy 
 _atom_site_symmetry_multiplicity 
 _atom_site_calc_flag 
 _atom_site_refinement_flags 
 _atom_site_disorder_assembly 
 _atom_site_disorder_group 
I1 I 0.744361(10) 1.105793(15) 0.341027(7) 0.02197(5) Uani 1 1 d . . . 
C7 C 0.54170(15) 0.8986(2) 0.40190(11) 0.0176(3) Uani 1 1 d . . . 
C8 C 0.58299(15) 0.9943(2) 0.34548(11) 0.0170(3) Uani 1 1 d . . . 
C3 C 0.71652(17) 0.8351(2) 0.59172(11) 0.0213(4) Uani 1 1 d . . . 
C1 C 0.58566(15) 0.8422(2) 0.47825(11) 0.0166(3) Uani 1 1 d . . . 
C5 C 0.55412(18) 0.6589(2) 0.58555(12) 0.0233(4) Uani 1 1 d . . . 
C9 C 0.50699(17) 1.0249(2) 0.27682(11) 0.0204(4) Uani 1 1 d . . . 
C4 C 0.65276(18) 0.7148(2) 0.62466(11) 0.0222(4) Uani 1 1 d . . . 
C2 C 0.68422(16) 0.8988(2) 0.51902(11) 0.0190(3) Uani 1 1 d . . . 
C6 C 0.52139(16) 0.7225(2) 0.51354(11) 0.0203(4) Uani 1 1 d . . . 
O1 O 0.52822(13) 1.11266(17) 0.22236(9) 0.0250(3) Uani 1 1 d . . . 
H3 H 0.781(2) 0.876(3) 0.6208(16) 0.025(6) Uiso 1 1 d . . . 
H7 H 0.468(2) 0.859(2) 0.3887(14) 0.022(6) Uiso 1 1 d . . . 
H6 H 0.455(2) 0.687(3) 0.4869(14) 0.026(6) Uiso 1 1 d . . . 
H2 H 0.7258(19) 0.978(3) 0.4984(14) 0.022(6) Uiso 1 1 d . . . 
H4 H 0.674(2) 0.672(3) 0.6748(15) 0.033(7) Uiso 1 1 d . . . 
H5 H 0.513(2) 0.579(3) 0.6074(15) 0.033(7) Uiso 1 1 d . . . 
H9 H 0.436(2) 0.968(3) 0.2770(13) 0.023(6) Uiso 1 1 d . . . 
 
loop_ 
 _atom_site_aniso_label 
 _atom_site_aniso_U_11 
 _atom_site_aniso_U_22 
 _atom_site_aniso_U_33 
 _atom_site_aniso_U_23 
 _atom_site_aniso_U_13 
 _atom_site_aniso_U_12 
I1 0.02034(7) 0.02533(8) 0.02024(7) 0.00207(4) 0.00007(4) -0.00654(5) 
C7 0.0156(8) 0.0184(9) 0.0186(8) -0.0034(7) 0.0005(6) 0.0002(6) 
C8 0.0161(8) 0.0176(8) 0.0173(8) -0.0028(7) -0.0004(6) -0.0002(6) 
C3 0.0199(8) 0.0260(10) 0.0181(9) -0.0031(7) -0.0023(7) 0.0016(7) 
C1 0.0165(8) 0.0165(8) 0.0168(8) -0.0021(7) 0.0024(6) 0.0018(6) 
C5 0.0280(10) 0.0194(10) 0.0225(10) 0.0019(8) 0.0017(8) -0.0020(7) 
C9 0.0214(9) 0.0230(10) 0.0168(8) -0.0028(7) -0.0009(6) 0.0002(7) 
C4 0.0280(10) 0.0225(10) 0.0162(9) 0.0004(7) -0.0006(7) 0.0055(7) 
C2 0.0177(8) 0.0211(9) 0.0182(8) -0.0015(7) 0.0008(6) -0.0011(7) 
C6 0.0196(8) 0.0195(9) 0.0218(9) -0.0013(7) -0.0002(7) -0.0019(7) 
O1 0.0297(7) 0.0271(7) 0.0181(7) 0.0022(6) -0.0019(5) 0.0017(6) 
 
_geom_special_details 
; 
 All esds (except the esd in the dihedral angle between two l.s. planes) 
 are estimated using the full covariance matrix.  The cell esds are taken 
 into account individually in the estimation of esds in distances, angles 
 and torsion angles; correlations between esds in cell parameters are only 
 used when they are defined by crystal symmetry.  An approximate (isotropic) 
 treatment of cell esds is used for estimating esds involving l.s. planes. 
; 
 
loop_ 
 _geom_bond_atom_site_label_1 
 _geom_bond_atom_site_label_2 
 _geom_bond_distance 
 _geom_bond_site_symmetry_2 
 _geom_bond_publ_flag 
I1 C8 2.0851(17) . ? 
C7 C8 1.346(3) . ? 
C7 C1 1.464(3) . ? 
C7 H7 0.93(2) . ? 
C8 C9 1.470(3) . ? 
C3 C4 1.388(3) . ? 
C3 C2 1.392(3) . ? 
C3 H3 0.96(3) . ? 
C1 C6 1.404(3) . ? 
C1 C2 1.408(2) . ? 
C5 C6 1.383(3) . ? 
C5 C4 1.393(3) . ? 
C5 H5 0.91(3) . ? 
C9 O1 1.216(2) . ? 
C9 H9 0.95(2) . ? 
C4 H4 0.95(3) . ? 
C2 H2 0.90(2) . ? 
C6 H6 0.94(2) . ? 
 
loop_ 
 _geom_angle_atom_site_label_1 
 _geom_angle_atom_site_label_2 
 _geom_angle_atom_site_label_3 
 _geom_angle 
 _geom_angle_site_symmetry_1 
 _geom_angle_site_symmetry_3 
 _geom_angle_publ_flag 
C8 C7 C1 134.78(17) . . ? 
C8 C7 H7 111.9(15) . . ? 
C1 C7 H7 113.3(15) . . ? 
C7 C8 C9 117.27(16) . . ? 
C7 C8 I1 128.44(13) . . ? 
C9 C8 I1 114.29(13) . . ? 
C4 C3 C2 120.64(18) . . ? 
C4 C3 H3 118.6(15) . . ? 
C2 C3 H3 120.7(15) . . ? 
C6 C1 C2 118.08(17) . . ? 
C6 C1 C7 116.01(16) . . ? 
C2 C1 C7 125.90(17) . . ? 
C6 C5 C4 119.59(19) . . ? 
C6 C5 H5 121.2(16) . . ? 
C4 C5 H5 119.2(16) . . ? 
O1 C9 C8 125.97(18) . . ? 
O1 C9 H9 119.8(14) . . ? 
C8 C9 H9 114.3(14) . . ? 
C3 C4 C5 119.91(18) . . ? 
C3 C4 H4 120.7(16) . . ? 
C5 C4 H4 119.4(16) . . ? 
C3 C2 C1 120.16(18) . . ? 
C3 C2 H2 119.9(15) . . ? 
C1 C2 H2 119.9(15) . . ? 
C5 C6 C1 121.60(18) . . ? 
C5 C6 H6 120.5(15) . . ? 
C1 C6 H6 117.9(15) . . ? 
 
loop_ 
 _geom_torsion_atom_site_label_1 
 _geom_torsion_atom_site_label_2 
 _geom_torsion_atom_site_label_3 
 _geom_torsion_atom_site_label_4 
 _geom_torsion 
 _geom_torsion_site_symmetry_1 
 _geom_torsion_site_symmetry_2 
 _geom_torsion_site_symmetry_3 
 _geom_torsion_site_symmetry_4 
 _geom_torsion_publ_flag 
C1 C7 C8 C9 -178.07(19) . . . . ? 
C1 C7 C8 I1 2.8(3) . . . . ? 
C8 C7 C1 C6 -170.3(2) . . . . ? 
C8 C7 C1 C2 10.8(3) . . . . ? 
C7 C8 C9 O1 176.81(19) . . . . ? 
I1 C8 C9 O1 -3.9(3) . . . . ? 
C2 C3 C4 C5 -1.2(3) . . . . ? 
C6 C5 C4 C3 0.8(3) . . . . ? 
C4 C3 C2 C1 0.4(3) . . . . ? 
C6 C1 C2 C3 0.8(3) . . . . ? 
C7 C1 C2 C3 179.71(17) . . . . ? 
C4 C5 C6 C1 0.4(3) . . . . ? 
C2 C1 C6 C5 -1.2(3) . . . . ? 
C7 C1 C6 C5 179.79(17) . . . . ? 
 
_diffrn_measured_fraction_theta_max    1.000 
_diffrn_reflns_theta_full              30.03 
_diffrn_measured_fraction_theta_full   1.000 
_refine_diff_density_max    0.771 
_refine_diff_density_min   -0.624 
_refine_diff_density_rms    0.080 
